# Supplementary material for: Radical chemistry in the Pearl River Delta: observations and modeling of OH and HO 2 radicals in Shenzhen 2018
Source: Copernicus journal article supplement (doi:10.5194/acp-2022-113), 2022-02-21
Supplement: Supplementary file 1 [file acp-2022-113-supplement.pdf]

1 **Supplement of**  
2 **Radical chemistry in the Pearl River Delta: observations and**  
3 **modeling of OH and HO<sub>2</sub> radicals in Shenzhen 2018**

4 Xinping Yang<sup>1,2</sup>, Keding Lu<sup>1,2,\*</sup>, Xuefei Ma<sup>1,2</sup>, Yue Gao<sup>1,2</sup>, Zhaofeng Tan<sup>3</sup>, Haichao Wang<sup>4</sup>, Xiaorui  
5 Chen<sup>1,2</sup>, Xin Li<sup>1,2</sup>, Xiaofeng Huang<sup>5</sup>, Lingyan He<sup>5</sup>, Mengxue Tang<sup>5</sup>, Bo Zhu<sup>5</sup>, Shiyi Chen<sup>1,2</sup>, Huabin  
6 Dong<sup>1,2</sup>, Limin Zeng<sup>1,2</sup>, Yuanhang Zhang<sup>1,2,\*</sup>

7 <sup>1</sup>State Key Joint Laboratory of Environmental Simulation and Pollution Control, College of Environmental Sciences and  
8 Engineering, Peking University, Beijing, China

9 <sup>2</sup>State Environmental Protection Key Laboratory of Atmospheric Ozone Pollution Control, Peking University, Beijing, China

10 <sup>3</sup>Institute of Energy and Climate Research, IEK-8: Troposphere, Forschungszentrum Juelich GmbH, Juelich, Germany

11 <sup>4</sup>School of Atmospheric Sciences, Sun Yat-Sen University, Zhuhai, China

12 <sup>5</sup>Laboratory of Atmospheric Observation Supersite, School of Environment and Energy, Peking University Shenzhen  
13 Graduate School, Shenzhen, China

14

15 Correspondence to: Keding Lu ([k.lu@pku.edu.cn](mailto:k.lu@pku.edu.cn)), Yuanhang Zhang ([yhzhang@pku.edu.cn](mailto:yhzhang@pku.edu.cn))

16

17 **Table S1: Information on the instruments at Shenzhen in autumn 2018.**

| Parameters             | Measurement technique          | Time resolution | Detection limit <sup>a</sup>      | Accuracy   |
|------------------------|--------------------------------|-----------------|-----------------------------------|------------|
| OH                     | LIF <sup>b</sup>               | 30 s            | $5.0 \times 10^5 \text{ cm}^{-3}$ | $\pm 11\%$ |
| HO <sub>2</sub>        | LIF <sup>b,c</sup>             | 30 s            | $1.0 \times 10^7 \text{ cm}^{-3}$ | $\pm 15\%$ |
| Photolysis frequencies | Spectroradiometer              | 10 s            | <sup>d</sup>                      | $\pm 5\%$  |
| O <sub>3</sub>         | UV photometry                  | 60 s            | 500 ppt                           | $\pm 5\%$  |
| NO                     | Chemiluminescence              | 60 s            | 50 ppt                            | $\pm 10\%$ |
| NO <sub>2</sub>        | Chemiluminescence <sup>e</sup> | 60 s            | 50 ppt                            | $\pm 10\%$ |
| HONO                   | LOPAP <sup>f</sup>             | 60 s            | 12 ppt                            | $\pm 20\%$ |
| CO                     | IR absorption                  | 60 s            | 50 ppt                            | $\pm 5\%$  |
| SO <sub>2</sub>        | Pulsed UV fluorescence         | 60 s            | 100 ppt                           | $\pm 10\%$ |
| HCHO                   | Hantzsch fluorimetry           | 60 s            | 25 ppt                            | $\pm 5\%$  |
| VOCs <sup>g</sup>      | GC-MS/FID <sup>h</sup>         | 1 h             | (20-300) ppt                      | $\pm 15\%$ |

18 Note that:

19 <sup>a</sup> Signal-to-noise ratio = 1. <sup>b</sup> Laser-Induced Fluorescence. <sup>c</sup> Chemical conversion via NO reaction before detection. <sup>d</sup>  
 20 Process-specific, 5 orders of magnitude lower than the maximum at noon. <sup>e</sup> Photolytic conversion to NO before detection,  
 21 home-built converter. <sup>f</sup> Long-path absorption photometry. <sup>g</sup> C<sub>2</sub>-C<sub>12</sub> VOCs. <sup>h</sup> Gas Chromatography with Mass Spectrometry /  
 22 with Flame Ionization Detection.

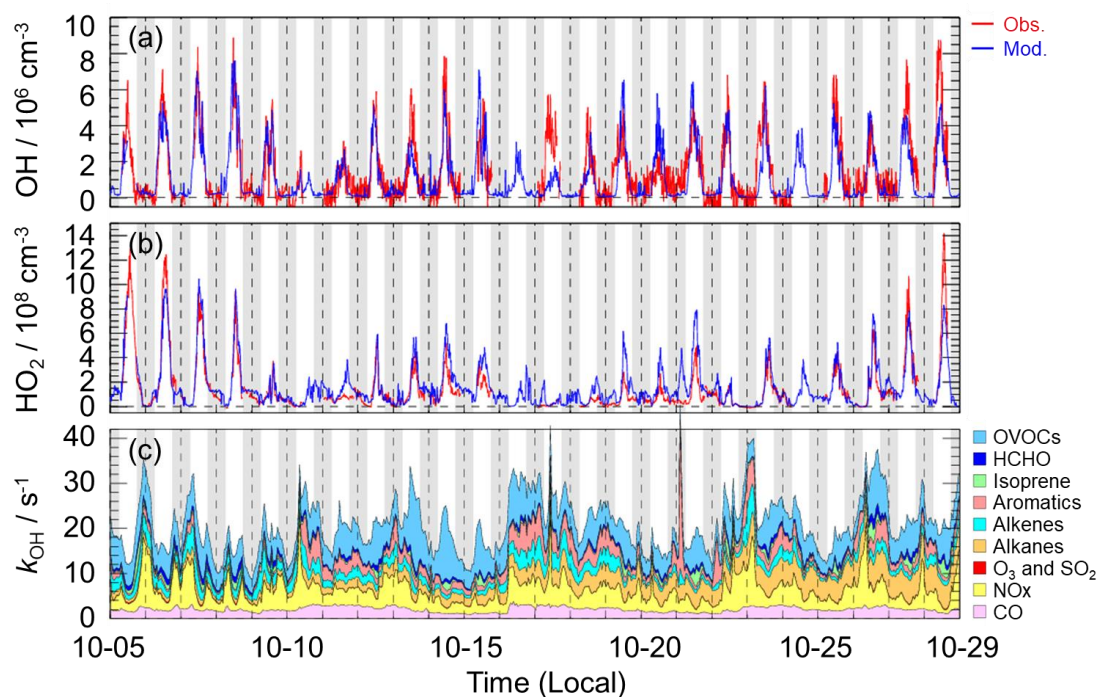

23

24 **Figure S1: Timeseries of the observed and modeled OH (a) and HO<sub>2</sub> (b) concentrations, and the modeled  $k_{OH}$  (c) in**  
 25 **this study. The grey areas denote nighttime.**

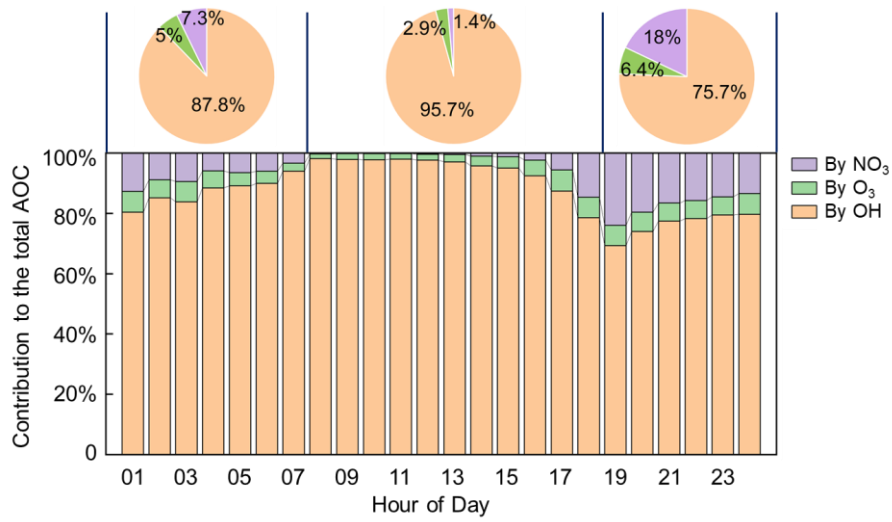

26

27 **Fig S2: The Histogram denotes the fractional composition of the total AOC. The left, middle and right pie charts**  
 28 **denote the mean contribution of OH, O<sub>3</sub>, and NO<sub>3</sub> to the total AOC during the second half of night (00:00-08:00),**  
 29 **daytime (08:00-18:00), and the first half of night (18:00-24:00), respectively.**
